# Supplementary material for: Long-term and continuous administration of Bacillus subtilis during remission effectively maintains the remission of inflammatory bowel disease by protecting intestinal integrity, regulating epithelial proliferation, and reshaping microbial structure and function
Source: Royal Society of Chemistry journal article supplement (doi:10.1039/d0fo02786c), 2021-01-01
Supplement: d0fo02786c1.pdf [file d0fo02786c1.pdf]

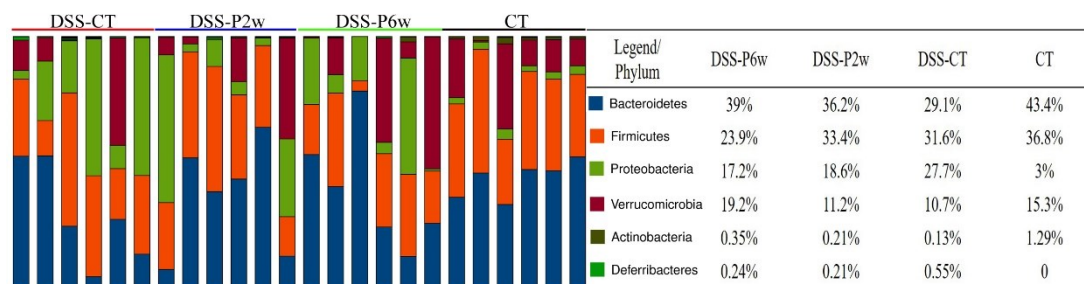

Supplementary figure1. The relative abundance of microbial phyla in each group

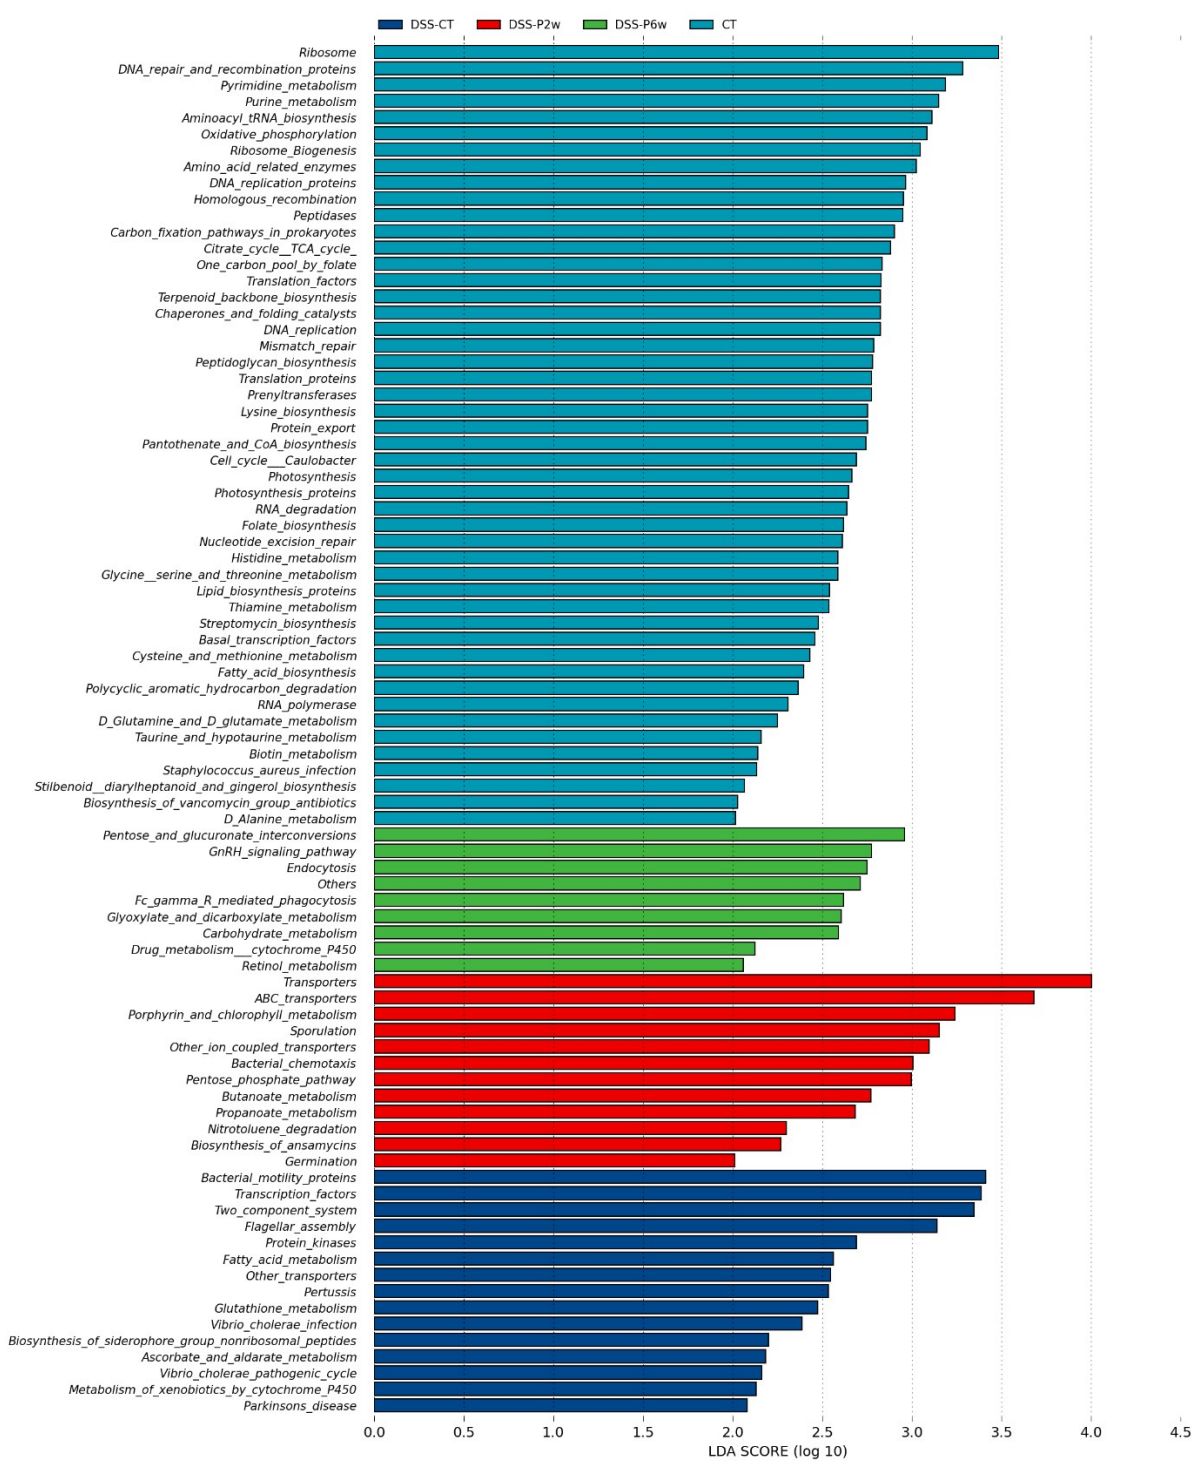

Supplementary figure 2: microbial function in level 3
